# Supplementary material
Source: Springer Nature journal article supplement (https://www.springermedizin.de/resource/supplementary/12885_2008_1193_MOESM1_ESM.pdf/9471364)

**MSS CRC**  
(n=53)

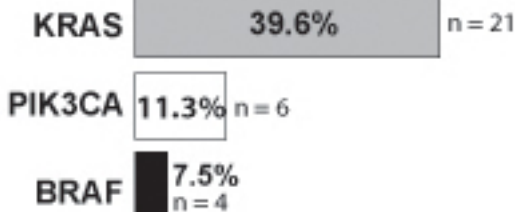

**CR Polyps**  
(n=17)

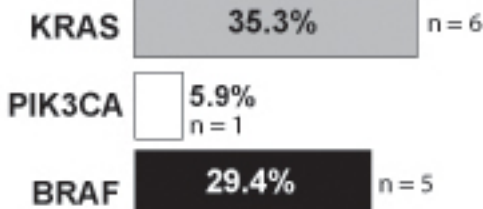

**MSI CRC**  
(n=50)

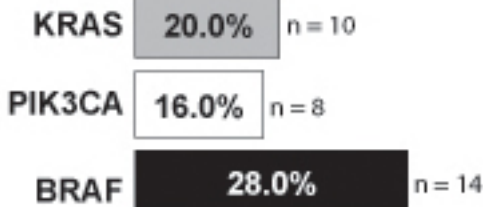

Supplement: MOESM1 [file 9471364]
